# Supplementary material for: Efficient targeted integration directed by short homology in zebrafish and mammalian cells
Source: eLife. 2020 May 15;9:e53968. doi: 10.7554/eLife.53968 (PMC7228771; doi:10.7554/eLife.53968)
Supplement: Supplementary file 1. — Supplementary Table S1 sgRNA efficiency. Supplementary Table S2 F0 embryo targeting averages. Supplementary Table S3 F0 embryo targeting data. Supplementary Table S4 F0 Germline transmission by gene. Supplementary Table S5 Individual F0 transmission data. Supplementary Table S6 sgRNA Target site information. Supplementary Table S7 Primer sequences. [file elife-53968-supp1.xlsx]

## Sheet: sgRNA efficiency
Supplementary Table S1 - sgRNA efficiency and indel analysis
MiSeq analysis (http://www.rgenome.net/cas-analyzer/#!)
Genomic target	Total Sequences	With both indicator sequences	More than minimum frequency	Insertions	Deletions	Indel frequency
noto E1	586150	272569	263767	78762	171616	250378 (94.9%)
cx43.4 E2	413382	202880	195246	35766	136296	172062 (88.1%)
esama E2	530220	260648	253376	60842	181799	242641 (95.8%)
msna E6	471634	151700	148417	34933	110992	145925 (98.3%)
rb1 E2	445834	210949	205066	25111	113885	138996 (67.8%)
rb1 E4	553219	270779	265278	37176	47180	84356 (31.8%)
rb1 E25	548102	260461	258038	12150	36582	48732 (18.9%)
aqp1a1 E1	642061	280303	269574	35272	195748	231020 (85.7%)
aqp8a1 E1	599553	282429	273806	22248	100045	122293 (44.7%)
Inference of CRISPR Edits analysis (www. icesynthego.com)
	ICE (%)	R Squared
msna E2	0.88	0.94
flna E4	0.92	0.97

## Sheet: F0 embryo targeting averages
Supplementary Table S2 - Gene targeting integration experiments and positive reporter embryo averages.
Genomic target	Donor vector	Donor sgRNA target (genomic or UgRNA)	Homology length (5'/3')	Experiment number	Reporter positive embryos	Total embryos	Percent with positive report	Standard Error	gRNA effeciency indel /method
noto E1	2A-TagRFP-CAAX-SV40	genomic sgRNA	12/x	Average	22	178	0.123596	0.0055	94.9% miSeq mutant phenotype observed
noto E1	2A-TagRFP-CAAX-SV40	genomic sgRNA	24/x	Average	30	131	0.229008	0.0074	see above
noto E1	2A-TagRFP-CAAX-SV40	genomic sgRNA	48/x	Average	40	114	0.350877	0.0101	see above
noto E2	2A-TagRFP-CAAX-SV40	UgRNA	24/x	Average	32	150	0.213333	0.0066	mutant phenotype observed smear observed on gel
noto E1	pGTag-2A-eGFP-SV40	UgRNA	24/24	Average	45	185	0.243243	0.009	see above
noto E1	pGTag-2A-eGFP-SV40	UgRNA	48/48	Average	44	172	0.255814	0.0082	see above
tyr E4	pGTag-2A-Gal4VP16-bactin	UgRNA	24/24	Average	84	132	0.636364	0.0144	mutant phenotype observed smear observed on gel
cx43.4 E2	pGTag-2A-TagRFP-CAAX-SV40	UgRNA	24/24	Average	42	84	0.5	0.0439	88.1% miSeq
cx43.4 E2	pGTag-2A-TagRFP-CAAX-SV40	UgRNA	48/48	Average	31	81	0.382716	0.0415	see above
esama E2	pGTag-2A-Gal4VP16-bactin	UgRNA	48/48	Average	34	162	0.209877	0.0059	95.8% miSeq
msna E2	pGTag-2A-Gal4VP16-bactin	UgRNA	48/48	Average	102	185	0.551351	0.0987	88% ICE mutant phenotype observed
msna E6	pGTag-2A-Gal4VP16-bactin	UgRNA	48/48	Average	25	96	0.260417		98.3% miSeq mutant phenotype observed
anxa2a E3	pGTag-2A-Gal4VP16-bactin	UgRNA	48/48	Average	12	34	0.353		smear observed on gel
flna E4	pGTag-2A-Gal4VP16-bactin	UgRNA	48/42	Average	9	9	1		92% ICE
aqp1a1 E1	pGTag-2A-Gal4VP16-bactin	UgRNA	48/48	Average	1	25	0.04		85.7% miSeq
aqp8a1 E1	pGTag-2A-Gal4VP16-bactin	UgRNA	48/48	Average	3	21	0.142857		44.7% miSeq
rb1 E2-E4	pGTag-2A-Gal4VP16-bactin	UgRNA	48/48	Average	273	463	0.59	0.0644	E2 67.8%; E4 31.8% miSeq mutant phenotype observed
rb1 E2-E25	pGTag-2A-Gal4VP16-bactin	UgRNA	48/48	Average	292	486	0.601	0.0378	E2 67.8%; E25 18.9% miSeq mutant phenotype observed
msna E2-E6	pGTag-2A-Gal4VP16-bactin	UgRNA	48/48	Average	91	151	0.602649	0.0592	see above
kdrl E3-E30	pGTag-2A-Gal4VP16-bactin	UgRNA	42/48	Average	8	23	0.347826		smear observed on gel
s1pr1 E2-E2	pGTag-2A-Gal4VP16-bactin	UgRNA	48/27	Average	76	94	0.808511		smear observed on gel
vegfaa E3-E7	pGTag-2A-Gal4VP16-bactin	UgRNA	48/48	Average	29	92	0.315217		mutant phenotype observed smear observed on gel
cx43.4 E2	pGTag-2A-TagRFP-CAAX-SV40	UgRNA	1Kb/1Kb	Average	60	177	0.338983	0.0523659	n/d, see above
cx43.4 E2	pGTag-2A-TagRFP-CAAX-SV40	n/a	1Kb/1Kb	Average	0	211	0	0	n/d
cx43.4 E2	pGTag-2A-TagRFP-CAAX-SV40	n/a	1Kb/1Kb	Average	2	127	0.015748	0.00797711	n/d
cx43.4 E2	pGTag-2A-TagRFP-CAAX-SV40	UgRNA	1Kb/1Kb	Average	0	81	0	0	n/d
cx43.4 E2	pGTag-2A-TagRFP-CAAX-SV40	n/a	1Kb/700	Average	5	94	0.0531915	0.0212122	n/d
cx43.4 E2	pGTag-2A-TagRFP-CAAX-SV40	n/a	1Kb/700	Average	0	82	0	0	n/d
n/a - not applicable
n/d - not determined
									0.0141859
									0.0718286
									0.0759692
									0.132362
									0.13956
									0
									0
									0
									0
									0
									0
									0
									0

## Sheet: F0 embryo targeting data
Supplementary Table S3 - Gene targeting experiments and knock-in percentages.
Genomic target	Donor vector	Donor sgRNA target (genomic or UgRNA)	Homology length (5'/3')	Experiment number	Reporter positive embryos	Total embryos	Percent reporter positive embryos	Standard Error
noto E1	2A-TagRFP-CAAX-SV40	genomic sgRNA	12/x	1	4	32	0.125
	2A-TagRFP-CAAX-SV40	genomic sgRNA	12/x	2	12	91	0.131868
	2A-TagRFP-CAAX-SV40	genomic sgRNA	12/x	3	6	55	0.109091
				Average	22	178	0.123596	0.00550781
noto E1	2A-TagRFP-CAAX-SV40	genomic sgRNA	24/x	1	10	47	0.212766
	2A-TagRFP-CAAX-SV40	genomic sgRNA	24/x	2	10	41	0.243902
	2A-TagRFP-CAAX-SV40	genomic sgRNA	24/x	3	10	43	0.232558
				Average	30	131	0.229008	0.00742843
noto E1	2A-TagRFP-CAAX-SV40	genomic sgRNA	48/x	1	10	29	0.344828
	2A-TagRFP-CAAX-SV40	genomic sgRNA	48/x	2	15	40	0.375
	2A-TagRFP-CAAX-SV40	genomic sgRNA	48/x	3	15	45	0.333333
				Average	40	114	0.350877	0.0101445
noto E2	2A-TagRFP-CAAX-SV40	UgRNA	24/x	1	13	62	0.209677
	2A-TagRFP-CAAX-SV40	UgRNA	24/x	2	10	49	0.204082
	2A-TagRFP-CAAX-SV40	UgRNA	24/x	3	9	39	0.230769
				Average	32	150	0.213333	0.00663438
noto E1	pGTag-2A-TagRFP-CAAX-SV40	UgRNA	24/24	1	18	68	0.264706
	pGTag-2A-TagRFP-CAAX-SV40	UgRNA	24/24	2	9	38	0.236842
	pGTag-2A-TagRFP-CAAX-SV40	UgRNA	24/24	3	6	28	0.214286
	pGTag-2A-TagRFP-CAAX-SV40	UgRNA	24/24	4	12	51	0.235294
				Average	45	185	0.243243	0.00895839
noto E1	pGTag-2A-eGFP-SV40	UgRNA	48/48	1	9	33	0.272727
	pGTag-2A-eGFP-SV40	UgRNA	48/48	2	17	71	0.239437
	pGTag-2A-eGFP-SV40	UgRNA	48/48	3	18	68	0.264706
				Average	44	172	0.255814	0.00819021
tyr E4	pGTag-2A-Gal4VP16-bactin	UgRNA	24/24	1	21	31	0.677419
	pGTag-2A-Gal4VP16-bactin	UgRNA	24/24	2	21	33	0.636364
	pGTag-2A-Gal4VP16-bactin	UgRNA	24/24	3	42	68	0.617647
				Average	84	132	0.636364	0.0144127
	2A-TagRFP-CAAX-SV40	genomic sgRNA	24/x	1	0	41	0
	2A-TagRFP-CAAX-SV40	genomic sgRNA	24/x	2	0	22	0
				Average	0	63	0	0
cx43.4 E2	pGTag-2A-TagRFP-CAAX-SV40	UgRNA	24/24	1	8	21	0.380952
	pGTag-2A-TagRFP-CAAX-SV40	UgRNA	24/24	2	15	29	0.517241
	pGTag-2A-TagRFP-CAAX-SV40	UgRNA	24/24	3	19	34	0.558824
				Average	42	84	0.5	0.0438609
cx43.4 E2	pGTag-2A-TagRFP-CAAX-SV40	UgRNA	48/48	1	10	34	0.294118
	pGTag-2A-TagRFP-CAAX-SV40	UgRNA	48/48	2	15	32	0.46875
	pGTag-2A-TagRFP-CAAX-SV40	UgRNA	48/48	3	6	15	0.4
				Average	31	81	0.382716	0.0414702
esama E2	pGTag-2A-Gal4VP16-bactin	UgRNA	20/20	1	1	18	0.0555556
	pGTag-2A-Gal4VP16-bactin	UgRNA	20/20	2	2	32	0.0625
	pGTag-2A-Gal4VP16-bactin	UgRNA	20/20	3	1	36	0.0277778
				Average	4	86	0.0465116	0.00866124
esama E2	pGTag-2A-Gal4VP16-bactin	UgRNA	24/24	1	9	40	0.225
	pGTag-2A-Gal4VP16-bactin	UgRNA	24/24	2	13	65	0.2
	pGTag-2A-Gal4VP16-bactin	UgRNA	24/24	3	12	57	0.210526
				Average	34	162	0.209877	0.00591699
msna E2	pGTag-2A-Gal4VP16-bactin	UgRNA	48/48	1	11	34	0.323529
			48/48	2	91	151	0.602649
				Average	102	185	0.551351	0.0986837
msna E6	pGTag-2A-Gal4VP16-bactin	UgRNA	48/48	1	25	96	0.260417
				Average	25	96	0.260417
anxa2a E3	pGTag-2A-Gal4VP16-bactin	UgRNA	48/48	1	12	34	0.353
				Average	12	34	0.353
flna E4	pGTag-2A-Gal4VP16-bactin	UgRNA	48/42	1	9	9	1
				Average	9	9	1
aqp1a1 E1	pGTag-2A-Gal4VP16-bactin	UgRNA	48/48	1	1	25	0.04
				2	n/a	n/a	n/a
				Average	1	25	0.04
aqp8a1 E1	pGTag-2A-Gal4VP16-bactin	UgRNA	48/48	1	3	21	0.142857
				Average	3	21	0.142857
rb1 E2-4	pGTag-2A-Gal4VP16-bactin	UgRNA	48/48	1	48	108	0.44
	pGTag-2A-Gal4VP16-bactin	UgRNA	48/48	2	56	111	0.5
	pGTag-2A-Gal4VP16-bactin	UgRNA	48/48	3	53	96	0.55
	pGTag-2A-Gal4VP16-bactin	UgRNA	48/48	4	116	148	0.78
				Average	273	463	0.59	0.0643598
rb1 E2-25	pGTag-2A-Gal4VP16-bactin	UgRNA	48/48	1	47	76	0.62
	pGTag-2A-Gal4VP16-bactin	UgRNA	48/48	2	58	119	0.49
	pGTag-2A-Gal4VP16-bactin	UgRNA	48/48	3	87	149	0.58
	pGTag-2A-Gal4VP16-bactin	UgRNA	48/48	4	100	142	0.7
				Average	292	486	0.601	0.0378112
msna E2-E6	pGTag-2A-Gal4VP16-bactin	UgRNA	48/48	1	8	13	0.615385
	pGTag-2A-Gal4VP16-bactin	UgRNA	48/48	2	29	34	0.852941
	pGTag-2A-Gal4VP16-bactin	UgRNA	48/48	3	17	34	0.5
	pGTag-2A-Gal4VP16-bactin	UgRNA	48/48	4	26	48	0.541667
	pGTag-2A-Gal4VP16-bactin	UgRNA	48/48	5	11	22	0.5
				Average	91	151	0.602649	0.0591942
kdrl E3-E30	pGTag-2A-Gal4VP16-bactin	UgRNA	42/48	1	8	23	0.347826
				Average	8	23	0.347826
s1pr1 E2-E2	pGTag-2A-Gal4VP16-bactin	UgRNA	48/27	1	76	94	0.808511
				Average	76	94	0.808511
vegfaa E3-E7	pGTag-2A-Gal4VP16-bactin	UgRNA	48/48	1	29	92	0.315217
				Average	29	92	0.315217
cx43.4 E2	pGTag-2A-TagRFP-CAAX-SV40	UgRNA	1Kb/1Kb	1	22	72	0.305556
GeneWeld	pGTag-2A-TagRFP-CAAX-SV40	UgRNA	1Kb/1Kb	2	24	51	0.470588
	pGTag-2A-TagRFP-CAAX-SV40	UgRNA	1Kb/1Kb	3	14	54	0.259259
				Average	60	177	0.338983	0.0523659
cx43.4 E2	pGTag-2A-TagRFP-CAAX-SV40	n/a	1Kb/1Kb	1	0	78	0
Plasmid Control	pGTag-2A-TagRFP-CAAX-SV40	n/a	1Kb/1Kb	2	0	50	0
	pGTag-2A-TagRFP-CAAX-SV40	n/a	1Kb/1Kb	3	0	83	0
				Average	0	211	0	0
cx43.4 E2	pGTag-2A-TagRFP-CAAX-SV40	n/a	1Kb/1Kb	1	1	30	0.0333333
Genomic Guide only	pGTag-2A-TagRFP-CAAX-SV40	n/a	1Kb/1Kb	2	1	46	0.0217391
	pGTag-2A-TagRFP-CAAX-SV40	n/a	1Kb/1Kb	3	0	51	0
				Average	2	127	0.015748	0.00797711
cx43.4 E2	pGTag-2A-TagRFP-CAAX-SV40	UgRNA	1Kb/1Kb	1	0	44	0
Universal Guide only	pGTag-2A-TagRFP-CAAX-SV40	UgRNA	1Kb/1Kb	2	0	24	0
	pGTag-2A-TagRFP-CAAX-SV40	UgRNA	1Kb/1Kb	3	0	13	0
				Average	0	81	0	0
cx43.4 E2	pGTag-2A-TagRFP-CAAX-SV40	n/a	1Kb/700	1	1	31	0.0322581
Linear Template	pGTag-2A-TagRFP-CAAX-SV40	n/a	1Kb/700	2	4	45	0.0888889
	pGTag-2A-TagRFP-CAAX-SV40	n/a	1Kb/700	3	0	18	0
				Average	5	94	0.0531915	0.0212122
cx43.4 E2	pGTag-2A-TagRFP-CAAX-SV40	n/a	1Kb/700	1	0	23	0
Linear Control	pGTag-2A-TagRFP-CAAX-SV40	n/a	1Kb/700	2	0	16	0
	pGTag-2A-TagRFP-CAAX-SV40	n/a	1Kb/700	3	0	43	0
				Average	0	82	0	0
esama E2	pGTag-2A-Gal4VP16-bactin	UgRNA	1Kb/1Kb	1	17	19	0.895
GeneWeld	pGTag-2A-Gal4VP16-bactin	UgRNA	1Kb/1Kb	2	18	22	0.818
	pGTag-2A-Gal4VP16-bactin	UgRNA	1Kb/1Kb	3	30	32	0.938
				Average	65	73	0.890411	0.0286602
esama E2	pGTag-2A-Gal4VP16-bactin	n/a	1Kb/1Kb	1	2	12	0.166667
Plasmid Control	pGTag-2A-Gal4VP16-bactin	n/a	1Kb/1Kb	2	9	35	0.257143
	pGTag-2A-Gal4VP16-bactin	n/a	1Kb/1Kb	3	1	18	0.0555556
				Average	12	65	0.184615	0.0475975
esama E2	pGTag-2A-Gal4VP16-bactin	n/a	1Kb/1Kb	1	8	15	0.533333
Genomic Guide only	pGTag-2A-Gal4VP16-bactin	n/a	1Kb/1Kb	2	3	11	0.272727
	pGTag-2A-Gal4VP16-bactin	n/a	1Kb/1Kb	3	8	20	0.4
				Average	19	46	0.413043	0.061431
esama E2	pGTag-2A-Gal4VP16-bactin	UgRNA	1Kb/1Kb	1	11	17	0.647059
Universal Guide only	pGTag-2A-Gal4VP16-bactin	UgRNA	1Kb/1Kb	2	13	18	0.722222
	pGTag-2A-Gal4VP16-bactin	UgRNA	1Kb/1Kb	3	9	20	0.45
				Average	33	55	0.6	0.0662729
esama E2	pGTag-2A-Gal4VP16-bactin	n/a	1Kb/700	1	27	31	0.870968
Linear Template	pGTag-2A-Gal4VP16-bactin	n/a	1Kb/700	2	20	24	0.833333
	pGTag-2A-Gal4VP16-bactin	n/a	1Kb/700	3	16	17	0.941176
				Average	63	72	0.875	0.0258025
esama E2	pGTag-2A-Gal4VP16-bactin	n/a	1Kb/700	1	17	18	0.944444
Linerar Control	pGTag-2A-Gal4VP16-bactin	n/a	1Kb/700	2	29	31	0.935484
	pGTag-2A-Gal4VP16-bactin	n/a	1Kb/700	3	20	21	0.952381
				Average	66	70	0.942857	0.00398512

## Sheet: F0Germline transmission by gene
Supplementary Table S4 - Germline Transmission Rates
Genomic Target gene Exon# 5'/3' homology arm length	F0 adults outcrossed	# Transmitting to F1 generation	Percentage Transmitting to F1 generation
noto E1 24/24	5	3	0.6
tyr E4 48/48	8	3	0.375
cx43.4 24/24	1	0	0
cx43.3 48/48	4	0	0
esama E2 48/48	18	12	0.666667
msna E2 48/48	4	1	0.25
msna E6 48/48	3	1	0.333333
anxa2a E3 48/48	4	4	1
flna E4 48/42	3	3	1
aqp1a1 E1 48/48	9	2	0.222222
aqp8a1 E1 48/48	1	1	1
rb1 E2-E4 48/48	10	0	0
rb1 E2-E25 48/48	16	1	0.0625
msna E2-E6 48/48	10	0	0
kdrl E3-E30 44/48	3	0	0
s1pr1 E2-E2 48/48	24	0	0
vegfaa E3-E7 48/48	16	0	0
mmp14a E1-E10 48/48	4	0	0

## Sheet: Individual F0 transmission data
Supplementary Table S5 - Individual F0 Adult germline transmission data
Genomic target gene Exon#	Knock-in	5'/3' Homology arm length	Individual F0	Crossed to	Reporter positive F1 embryos	Total F1 embryos	Percent germline transmission
noto E1	pGTag-2A-TagRFP-CAAX-SV40	24/24	1	Casper	4	28	0.142857
noto E1	pGTag-2A-TagRFP-CAAX-SV40	24/24	2	Casper	0	172	0
noto E1	pGTag-2A-TagRFP-CAAX-SV40	24/24	3	Casper	0	15	0
noto E1	pGTag-2A-TagRFP-CAAX-SV40	24/24	4	Casper	69	146	0.472603
noto E1	pGTag-2A-TagRFP-CAAX-SV40	24/24	1	Casper	11	61	0.180328
noto E1	pGTag-2A-TagRFP-CAAX-SV40	24/24	2	Casper	0	81	0
tyr E4	pGTag-2A-Gal4VP16-bactin	24/24	1	UAS:RFP	0	174	0
tyr E4	pGTag-2A-Gal4VP16-bactin	24/24	2	UAS:RFP	0	122	0
tyr E4	pGTag-2A-Gal4VP16-bactin	24/24	3	UAS:RFP	0	45	0
tyr E4	pGTag-2A-Gal4VP16-bactin	24/24	4	UAS:RFP	0	87	0
tyr E4	pGTag-2A-Gal4VP16-bactin	24/24	5	UAS:RFP	0	103	0
tyr E4	pGTag-2A-Gal4VP16-bactin	24/24	6	UAS:RFP	8	89	0.0898876
tyr E4	pGTag-2A-Gal4VP16-bactin	24/24	7	UAS:RFP	13	151	0.0860927
tyr E4	pGTag-2A-Gal4VP16-bactin	24/24	8	UAS:RFP	0	113	0
tyr E4	pGTag-2A-Gal4VP16-bactin	24/24	9	UAS:RFP	19	155	0.122581
cx43.4 E2	pGTag-2A-TagRFP-CAAX-SV41	24/24	1	fli1:EGFP	0	39	0
cx43.4 E2	pGTag-2A-TagRFP-CAAX-SV42	24/24	2	fli1:EGFP	0	0	N/A
cx43.4 E2	pGTag-2A-TagRFP-CAAX-SV43	24/24	3	fli1:EGFP	0	0	N/A
cx43.4 E2	pGTag-2A-TagRFP-CAAX-SV44	24/24	4	fli1:EGFP	0	15	0
cx43.4 E2	pGTag-2A-TagRFP-CAAX-SV45	24/24	5	fli1:EGFP	0	26	0
cx43.4 E2	pGTag-2A-TagRFP-CAAX-SV46	24/24	6	fli1:EGFP	0	0	N/A
cx43.4 E2	pGTag-2A-TagRFP-CAAX-SV47	24/24	7	fli1:EGFP	0	23	0
cx43.4 E2	pGTag-2A-TagRFP-CAAX-SV48	24/24	8	fli1:EGFP	0	0	N/A
cx43.4 E2	pGTag-2A-TagRFP-CAAX-SV49	24/24	9	fli1:EGFP	0	45	0
cx43.4 E2	pGTag-2A-TagRFP-CAAX-SV50	24/24	10	fli1:EGFP	0	82	0
cx43.4 E2	pGTag-2A-TagRFP-CAAX-SV40	48/48	1	fli1:EGFP	0	130	0
cx43.4 E2	pGTag-2A-TagRFP-CAAX-SV40	48/48	2	fli1:EGFP	0	100	0
cx43.4 E2	pGTag-2A-TagRFP-CAAX-SV40	48/48	3	fli1:EGFP	0	75	0
cx43.4 E2	pGTag-2A-TagRFP-CAAX-SV40	48/48	4	fli1:EGFP	0	52	0
cx43.4 E2	pGTag-2A-TagRFP-CAAX-SV40	48/48	5	fli1:EGFP	0	0	N/A
cx43.4 E2	pGTag-2A-TagRFP-CAAX-SV40	48/48	6	fli1:EGFP	0	12	0
cx43.4 E2	pGTag-2A-TagRFP-CAAX-SV40	48/48	7	fli1:EGFP	0	0	N/A
cx43.4 E2	pGTag-2A-TagRFP-CAAX-SV40	48/48	8	fli1:EGFP	0	0	N/A
cx43.4 E2	pGTag-2A-TagRFP-CAAX-SV40	48/48	9	fli1:EGFP	0	34	0
cx43.4 E2	pGTag-2A-TagRFP-CAAX-SV40	48/48	10	fli1:EGFP	0	86	0
cx43.4 E2	pGTag-2A-TagRFP-CAAX-SV40	48/48	11	fli1:EGFP	0	0	N/A
cx43.4 E2	pGTag-2A-TagRFP-CAAX-SV40	48/48	12	fli1:EGFP	0	0	N/A
cx43.4 E2	pGTag-2A-TagRFP-CAAX-SV40	48/48	13	fli1:EGFP	0	0	N/A
cx43.4 E2	pGTag-2A-TagRFP-CAAX-SV40	48/48	14	fli1:EGFP	0	0	N/A
esama E2	pGTag-2A-Gal4VP16-bactin	24/24	1	pDB790	0	21	0
esama E2	pGTag-2A-Gal4VP16-bactin	24/24	2	pDB790	0	212	0
esama E2	pGTag-2A-Gal4VP16-bactin	24/24	3	pDB790	0	31	0
esama E2	pGTag-2A-Gal4VP16-bactin	24/24	4	pDB790	1	4	0.25
esama E2	pGTag-2A-Gal4VP16-bactin	24/24	5	pDB790	1	12	0.0833333
esama E2	pGTag-2A-Gal4VP16-bactin	24/24	6	pDB790	14	104	0.134615
esama E2	pGTag-2A-Gal4VP16-bactin	24/24	7	pDB790	0	87	0
esama E2	pGTag-2A-Gal4VP16-bactin	24/24	8	pDB790	0	209	0
esama E2	pGTag-2A-Gal4VP16-bactin	24/24	9	pDB790	0	132	0
esama E2	pGTag-2A-Gal4VP16-bactin	24/24	10	pDB790	4	18	0.222222
esama E2	pGTag-2A-Gal4VP16-bactin	24/24	11	pDB790	0	37	0
esama E2	pGTag-2A-Gal4VP16-bactin	24/24	12	pDB790	11	43	0.255814
esama E2	pGTag-2A-Gal4VP16-bactin	24/24	13	pDB790	14	97	0.14433
esama E2	pGTag-2A-Gal4VP16-bactin	24/24	14	pDB790	0	91	0
esama E2	pGTag-2A-Gal4VP16-bactin	24/24	15	pDB790	7	127	0.0551181
esama E2	pGTag-2A-Gal4VP16-bactin	24/24	16	pDB790	0	25	0
esama E2	pGTag-2A-Gal4VP16-bactin	24/24	17	pDB790	30	137	0.218978
esama E2	pGTag-2A-Gal4VP16-bactin	24/24	18	pDB790	8	265	0.0301887
esama E2	pGTag-2A-Gal4VP16-bactin	24/24	19	pDB790	31	227	0.136564
esama E2	pGTag-2A-Gal4VP16-bactin	24/24	20	pDB790	11	146	0.0753425
esama E2	pGTag-2A-Gal4VP16-bactin	24/24	21	pDB790	0	188	0
esama E2	pGTag-2A-Gal4VP16-bactin	24/24	22	pDB790	3	66	0.0454545
msna E2	pGTag-2A-Gal4VP16-bactin	48/48	1	pDB790	42	144	0.291667
msna E2	pGTag-2A-Gal4VP16-bactin	48/48	2	pDB790	0	377	0
msna E2	pGTag-2A-Gal4VP16-bactin	48/48	3	pDB790	0	202	0
msna E2	pGTag-2A-Gal4VP16-bactin	48/48	4	pDB790	0	150	0
msna E6	pGTag-2A-Gal4VP16-bactin	48/48	1	pDB790	23	311	0.073955
msna E6	pGTag-2A-Gal4VP16-bactin	48/48	2	pDB790	0	67	0
msna E6	pGTag-2A-Gal4VP16-bactin	48/48	3	pDB790	0	54	0
anxa2a E3	pGTag-2A-Gal4VP16-bactin	48/48	1	pDB790	16	73	0.219178
anxa2a E3	pGTag-2A-Gal4VP16-bactin	48/48	2	pDB790	10	22	0.454545
anxa2a E3	pGTag-2A-Gal4VP16-bactin	48/48	3	pDB790	37	70	0.528571
anxa2a E3	pGTag-2A-Gal4VP16-bactin	48/48	4	pDB790	23	36	0.638889
flna E4	pGTag-2A-Gal4VP16-bactin	48/42	1	pDB790	21	64	0.328125
flna E4	pGTag-2A-Gal4VP16-bactin	48/42	2	pDB790	1	52	0.0192308
flna E4	pGTag-2A-Gal4VP16-bactin	48/42	3	pDB790	4	21	0.190476
aqp1a1 E1	pGTag-2A-Gal4VP16-bactin	48/48	1	pDB790	0	N/A	N/A
aqp1a1 E1	pGTag-2A-Gal4VP16-bactin	48/48	2	pDB790	19	281	0.0676157
aqp1a1 E1	pGTag-2A-Gal4VP16-bactin	48/48	3	pDB790	0	N/A	N/A
aqp1a1 E1	pGTag-2A-Gal4VP16-bactin	48/48	4	pDB790	n>1	N/A	N/A
aqp1a1 E1	pGTag-2A-Gal4VP16-bactin	48/48	5	pDB790	0	N/A	N/A
aqp1a1 E1	pGTag-2A-Gal4VP16-bactin	48/48	6	pDB790	0	N/A	N/A
aqp1a1 E1	pGTag-2A-Gal4VP16-bactin	48/48	7	pDB790	0	N/A	N/A
aqp1a1 E1	pGTag-2A-Gal4VP16-bactin	48/48	8	pDB790	0	N/A	N/A
aqp1a1 E1	pGTag-2A-Gal4VP16-bactin	48/48	9	pDB790	0	N/A	N/A
aqp8a1 E1	pGTag-2A-Gal4VP16-bactin	48/48	1	pDB790	1	7	0.142857
rb1 E2-E4	pGTag-2A-Gal4VP16-bactin	48/48	1	pDB790	0	38	0
rb1 E2-E4	pGTag-2A-Gal4VP16-bactin	48/48	2	pDB790	0	103	0
rb1 E2-E4	pGTag-2A-Gal4VP16-bactin	48/48	3	pDB790	0	61	0
rb1 E2-E4	pGTag-2A-Gal4VP16-bactin	48/48	4	pDB790	0	73	0
rb1 E2-E4	pGTag-2A-Gal4VP16-bactin	48/48	5	pDB790	0	57	0
rb1 E2-E4	pGTag-2A-Gal4VP16-bactin	48/48	6	pDB790	0	69	0
rb1 E2-E4	pGTag-2A-Gal4VP16-bactin	48/48	7	pDB790	0	37	0
rb1 E2-E4	pGTag-2A-Gal4VP16-bactin	48/48	8	pDB790	0	113	0
rb1 E2-E4	pGTag-2A-Gal4VP16-bactin	48/48	9	pDB790	0	79	0
rb1 E2-E4	pGTag-2A-Gal4VP16-bactin	48/48	10	pDB790	0	20	0
rb1 E2-E4	pGTag-2A-Gal4VP16-bactin	48/48	11	pDB790	0	136	0
rb1 E2-E4	pGTag-2A-Gal4VP16-bactin	48/48	12	pDB790	0	124	0
rb1 E2-E4	pGTag-2A-Gal4VP16-bactin	48/48	13	pDB790	0	129	0
rb1 E2-E4	pGTag-2A-Gal4VP16-bactin	48/48	14	pDB790	0	39	0
rb1 E2-E4	pGTag-2A-Gal4VP16-bactin	48/48	15	pDB790	0	123	0
rb1 E2-E4	pGTag-2A-Gal4VP16-bactin	48/48	16	pDB790	0	40	0
rb1 E2-E4	pGTag-2A-Gal4VP16-bactin	48/48	17	pDB790	0	99	0
rb1 E2-E4	pGTag-2A-Gal4VP16-bactin	48/48	18	pDB790	0	208	0
rb1 E2-E4	pGTag-2A-Gal4VP16-bactin	48/48	19	pDB790	0	241	0
rb1 E2-E25	pGTag-2A-Gal4VP16-bactin	48/48	1	pDB790	0	49	0
rb1 E2-E25	pGTag-2A-Gal4VP16-bactin	48/48	2	pDB790	0	78	0
rb1 E2-E25	pGTag-2A-Gal4VP16-bactin	48/48	3	pDB790	0	162	0
rb1 E2-E25	pGTag-2A-Gal4VP16-bactin	48/48	4	pDB790	12	25	0.48
rb1 E2-E25	pGTag-2A-Gal4VP16-bactin	48/48	5	pDB790	0	79	0
rb1 E2-E25	pGTag-2A-Gal4VP16-bactin	48/48	6	pDB790	0	4	0
rb1 E2-E25	pGTag-2A-Gal4VP16-bactin	48/48	7	pDB790	0	200	0
rb1 E2-E25	pGTag-2A-Gal4VP16-bactin	48/48	8	pDB790	0	38	0
rb1 E2-E25	pGTag-2A-Gal4VP16-bactin	48/48	9	pDB790	0	128	0
rb1 E2-E25	pGTag-2A-Gal4VP16-bactin	48/48	10	pDB790	0	7	0
rb1 E2-E25	pGTag-2A-Gal4VP16-bactin	48/48	11	pDB790	0	119	0
rb1 E2-E25	pGTag-2A-Gal4VP16-bactin	48/48	12	pDB790	0	136	0
rb1 E2-E25	pGTag-2A-Gal4VP16-bactin	48/48	13	pDB790	0	76	0
rb1 E2-E25	pGTag-2A-Gal4VP16-bactin	48/48	14	pDB790	0	159	0
rb1 E2-E25	pGTag-2A-Gal4VP16-bactin	48/48	15	pDB790	0	168	0
rb1 E2-E25	pGTag-2A-Gal4VP16-bactin	48/48	16	pDB790	0	139	0
rb1 E2-E25	pGTag-2A-Gal4VP16-bactin	48/48	17	pDB790	0	25	0
rb1 E2-E25	pGTag-2A-Gal4VP16-bactin	48/48	18	pDB790	0	4	0
rb1 E2-E25	pGTag-2A-Gal4VP16-bactin	48/48	19	pDB790	0	81	0
rb1 E2-E25	pGTag-2A-Gal4VP16-bactin	48/48	20	pDB790	0	71	0
rb1 E2-E25	pGTag-2A-Gal4VP16-bactin	48/48	21	pDB790	0	75	0
rb1 E2-E25	pGTag-2A-Gal4VP16-bactin	48/48	22	pDB790	0	81	0
rb1 E2-E25	pGTag-2A-Gal4VP16-bactin	48/48	23	pDB790	0	76	0
rb1 E2-E25	pGTag-2A-Gal4VP16-bactin	48/48	24	pDB790	0	72	0
rb1 E2-E25	pGTag-2A-Gal4VP16-bactin	48/48	25	pDB790	0	69	0
rb1 E2-E25	pGTag-2A-Gal4VP16-bactin	48/48	26	pDB790	0	33	0
rb1 E2-E25	pGTag-2A-Gal4VP16-bactin	48/48	27	pDB790	0	74	0
msna E2-E6	pGTag-2A-Gal4VP16-bactin	48/48	1	pDB790	0	180	0
msna E2-E6	pGTag-2A-Gal4VP16-bactin	48/48	2	pDB790	0	53	0
msna E2-E6	pGTag-2A-Gal4VP16-bactin	48/48	3	pDB790	0	0	N/A
msna E2-E6	pGTag-2A-Gal4VP16-bactin	48/48	4	pDB790	0	0	N/A
msna E2-E6	pGTag-2A-Gal4VP16-bactin	48/48	5	pDB790	0	93	0
msna E2-E6	pGTag-2A-Gal4VP16-bactin	48/48	6	pDB790	0	23	0
msna E2-E6	pGTag-2A-Gal4VP16-bactin	48/48	7	pDB790	0	357	0
msna E2-E6	pGTag-2A-Gal4VP16-bactin	48/48	8	pDB790	0	100	0
msna E2-E6	pGTag-2A-Gal4VP16-bactin	48/48	9	pDB790	0	235	0
msna E2-E6	pGTag-2A-Gal4VP16-bactin	48/48	10	pDB790	0	237	0
msna E2-E6	pGTag-2A-Gal4VP16-bactin	48/48	11	pDB790	0	84	0
msna E2-E6	pGTag-2A-Gal4VP16-bactin	48/48	12	pDB790	0	117	0
kdrl E3-E30	pGTag-2A-Gal4VP16-bactin	42/48	1	pDB790	0	250	0
kdrl E3-E30	pGTag-2A-Gal4VP16-bactin	42/48	2	pDB790	0	250	0
kdrl E3-E30	pGTag-2A-Gal4VP16-bactin	42/48	3	pDB790	0	250	0
s1pr1 E2-E2	pGTag-2A-Gal4VP16-bactin	48/27	1	s1pr1 E2-E2 Animal 2	0	150	0
s1pr1 E2-E2	pGTag-2A-Gal4VP16-bactin	48/27	2	s1pr1 E2-E2 Animal 1	0	150	0
s1pr1 E2-E2	pGTag-2A-Gal4VP16-bactin	48/27	3	s1pr1 E2-E2 Animal 4	0	150	0
s1pr1 E2-E2	pGTag-2A-Gal4VP16-bactin	48/27	4	s1pr1 E2-E2 Animal 3	0	150	0
s1pr1 E2-E2	pGTag-2A-Gal4VP16-bactin	48/27	5	s1pr1 E2-E2 Animal 6	0	150	0
s1pr1 E2-E2	pGTag-2A-Gal4VP16-bactin	48/27	6	s1pr1 E2-E2 Animal 5	0	150	0
s1pr1 E2-E2	pGTag-2A-Gal4VP16-bactin	48/27	7	s1pr1 E2-E2 Animal 8	0	150	0
s1pr1 E2-E2	pGTag-2A-Gal4VP16-bactin	48/27	8	s1pr1 E2-E2 Animal 7	0	150	0
s1pr1 E2-E2	pGTag-2A-Gal4VP16-bactin	48/27	9	s1pr1 E2-E2 Animal 10	0	150	0
s1pr1 E2-E2	pGTag-2A-Gal4VP16-bactin	48/27	10	s1pr1 E2-E2 Animal 9	0	150	0
s1pr1 E2-E2	pGTag-2A-Gal4VP16-bactin	48/27	11	s1pr1 E2-E2 Animal 12	0	150	0
s1pr1 E2-E2	pGTag-2A-Gal4VP16-bactin	48/27	12	s1pr1 E2-E2 Animal 11	0	150	0
s1pr1 E2-E2	pGTag-2A-Gal4VP16-bactin	48/27	13	s1pr1 E2-E2 Animal 14	0	150	0
s1pr1 E2-E2	pGTag-2A-Gal4VP16-bactin	48/27	14	s1pr1 E2-E2 Animal 13	0	150	0
s1pr1 E2-E2	pGTag-2A-Gal4VP16-bactin	48/27	15	s1pr1 E2-E2 Animal 16	0	150	0
s1pr1 E2-E2	pGTag-2A-Gal4VP16-bactin	48/27	16	s1pr1 E2-E2 Animal 15	0	150	0
s1pr1 E2-E2	pGTag-2A-Gal4VP16-bactin	48/27	17	s1pr1 E2-E2 Animal 18	0	150	0
s1pr1 E2-E2	pGTag-2A-Gal4VP16-bactin	48/27	18	s1pr1 E2-E2 Animal 17	0	150	0
s1pr1 E2-E2	pGTag-2A-Gal4VP16-bactin	48/27	19	s1pr1 E2-E2 Animal 20	0	150	0
s1pr1 E2-E2	pGTag-2A-Gal4VP16-bactin	48/27	20	s1pr1 E2-E2 Animal 19	0	150	0
s1pr1 E2-E2	pGTag-2A-Gal4VP16-bactin	48/27	21	s1pr1 E2-E2 Animal 22	0	150	0
s1pr1 E2-E2	pGTag-2A-Gal4VP16-bactin	48/27	22	s1pr1 E2-E2 Animal 21	0	150	0
s1pr1 E2-E2	pGTag-2A-Gal4VP16-bactin	48/27	23	s1pr1 E2-E2 Animal 24	0	150	0
s1pr1 E2-E2	pGTag-2A-Gal4VP16-bactin	48/27	24	s1pr1 E2-E2 Animal 23	0	150	0
vegfaa E3-E7	pGTag-2A-Gal4VP16-bactin	48/48	1	vegfaa E3-E7 Animal 2	0	150	0
vegfaa E3-E7	pGTag-2A-Gal4VP16-bactin	48/48	2	vegfaa E3-E7 Animal 1	0	150	0
vegfaa E3-E7	pGTag-2A-Gal4VP16-bactin	48/48	3	vegfaa E3-E7 Animal 4	0	150	0
vegfaa E3-E7	pGTag-2A-Gal4VP16-bactin	48/48	4	vegfaa E3-E7 Animal 3	0	150	0
vegfaa E3-E7	pGTag-2A-Gal4VP16-bactin	48/48	5	vegfaa E3-E7 Animal 6	0	150	0
vegfaa E3-E7	pGTag-2A-Gal4VP16-bactin	48/48	6	vegfaa E3-E7 Animal 5	0	150	0
vegfaa E3-E7	pGTag-2A-Gal4VP16-bactin	48/48	7	vegfaa E3-E7 Animal 8	0	150	0
vegfaa E3-E7	pGTag-2A-Gal4VP16-bactin	48/48	8	vegfaa E3-E7 Animal 7	0	150	0
vegfaa E3-E7	pGTag-2A-Gal4VP16-bactin	48/48	9	vegfaa E3-E7 Animal 10	0	150	0
vegfaa E3-E7	pGTag-2A-Gal4VP16-bactin	48/48	10	vegfaa E3-E7 Animal 9	0	150	0
vegfaa E3-E7	pGTag-2A-Gal4VP16-bactin	48/48	11	vegfaa E3-E7 Animal 12	0	150	0
vegfaa E3-E7	pGTag-2A-Gal4VP16-bactin	48/48	12	vegfaa E3-E7 Animal 11	0	150	0
vegfaa E3-E7	pGTag-2A-Gal4VP16-bactin	48/48	13	vegfaa E3-E7 Animal 14	0	150	0
vegfaa E3-E7	pGTag-2A-Gal4VP16-bactin	48/48	14	vegfaa E3-E7 Animal 13	0	150	0
vegfaa E3-E7	pGTag-2A-Gal4VP16-bactin	48/48	15	vegfaa E3-E7 Animal 16	0	150	0
vegfaa E3-E7	pGTag-2A-Gal4VP16-bactin	48/48	16	vegfaa E3-E7 Animal 15	0	150	0
mmp14a E1-E10	pGTag-2A-Gal4VP16-bactin	48/48	1	mmp14a E1-E10 Animal 2	0	112	0
mmp14a E1-E10	pGTag-2A-Gal4VP16-bactin	48/48	2	mmp14a E1-E10 Animal 1	0	112	0
mmp14a E1-E10	pGTag-2A-Gal4VP16-bactin	48/48	3	mmp14a E1-E10 Animal 4	0	150	0
mmp14a E1-E10	pGTag-2A-Gal4VP16-bactin	48/48	4	mmp14a E1-E10 Animal 3	0	150	0

## Sheet: sgRNA Target site information 
Supplementary Table S6 - CRISPR sgRNA target site information for all gene targeting experiments. N/A, not applicable
Genomic target	Donor vector	Genomic sgRNA target site. PAM underlined	Donor vector sgRNA target site. PAM underlined	5' spacer	5' Homology Arm length (bp)	5' Homology Arm	3' spacer	3' Homology Arm length (bp)	3' Homology Arm
noto E1	2A-TagRFP-CAAX-SV40	GGGAGCGCAGAGCTGGAGACAGG	GGGAGCGCAGAGCTGGAGACAGG	aaa	12	CAAACGCCTGTC	N/A	N/A	N/A
noto E1	2A-TagRFP-CAAX-SV40	GGGAGCGCAGAGCTGGAGACAGG	GGGAGCGCAGAGCTGGAGACAGG	aaa	24	AGCATAACCAACCAAACGCCTGTC	N/A	N/A	N/A
noto E1	2A-TagRFP-CAAX-SV40	GGGAGCGCAGAGCTGGAGACAGG	GGGAGCGCAGAGCTGGAGACAGG	aaa	48	AGAGAACGAACAAACGCGTACCGGAGCATAACCAACCAAACGCCTGTC	N/A	N/A	N/A
noto E2	2A-TagRFP-CAAX-SV40	GACTGGAGAAAGAGTTCGCGCGG	GACTGGAGAAAGAGTTCGCGCGG	aaa	24	CTGTCCAGACTGGAGAAAGAGTTC	N/A	N/A	N/A
noto E2	2A-TagRFP-CAAX-SV40	GACTGGAGAAAGAGTTCGCGCGG	GGGAGGCGTTCGGGCCACAGCGG	N/A	24	CTGTCCAGACTGGAGAAAGAGTTC	N/A	N/A	N/A
noto E1	pGTag-2A-TagRFP-CAAX-SV40	GGGAGCGCAGAGCTGGAGACAGG	GGGAGGCGTTCGGGCCACAGCGG	aaa	24	AGCATAACCAACCAAACGCCTGTC	N/A	24	TCCAGCTCTGCGCTCCCGCTTATT
noto E1	pGTag-2A-eGFP-SV40	GGGAGCGCAGAGCTGGAGACAGG	GGGAGGCGTTCGGGCCACAGCGG	aaa	48	AGAGAACGAACAAACGCGTACCGGAGCATAACCAACCAAACGCCTGTC	ggg	48	TCCAGCTCTGCGCTCCCGCTTATTTACTCGCAGATGCCACACTTCGCG
tyr E4	pGTag-2A-Gal4VP16-bactin	GTTCCTGTAGAGAGGGATGAAGG	GGGAGGCGTTCGGGCCACAGCGG	aaa	24	ACGGATACTTCATGGTGCCCTTCA	N/A	24	TCCCTCTCTACAGGAACGGAGACT
cx43.4 E2	pGTag-2A-TagRFP-CAAX-SV40	GAGCCATATCTTGCCCACGAAGG	GGGAGGCGTTCGGGCCACAGCGG	ccc	24	AAATCTCCAACCACTCCACCTTCG	ggg	24	TGGGCAAGATATGGCTCACGTTAT
cx43.4 E2	pGTag-2A-TagRFP-CAAX-SV40	GAGCCATATCTTGCCCACGAAGG	GGGAGGCGTTCGGGCCACAGCGG	ccc	48	GTTTTCTTACGCGGTTGTTGGATGAAATCTCCAACCACTCCACCTTCG	aaa	48	TGGGCAAGATATGGCTCACGTTATTCATCATCTTCCGCATTGTTTTGA
cx43.4 E2	pGTag-2A-TagRFP-CAAX-SV40	GAGCCATATCTTGCCCACGAAGG	GGGAGGCGTTCGGGCCACAGCGG	gcg	20	CTCCAACCACTCCACCTTCG	ggg	20	TGGGCAAGATATGGCTCACG
cx43.4 E2	pGTag-2A-TagRFP-CAAX-SV40	GAGCCATATCTTGCCCACGAAGG	GGGAGGCGTTCGGGCCACAGCGG	gcc	40	ACGCGGTTGTTGGATGAAATCTCCAACCACTCCACCTTCG	aaa	40	TGGGCAAGATATGGCTCACGTTATTCATCATCTTCCGCAT
cx43.4 E2	2A-TagRFP-CAAX-SV40	GAGCCATATCTTGCCCACGAAGG	GGGAGGCGTTCGGGCCACAGCGG	aaa	18	CCAACCACTCCACCTTCG	N/A	N/A	N/A
cx43.4 E2	2A-TagRFP-CAAX-SV40	GAGCCATATCTTGCCCACGAAGG	GGGAGGCGTTCGGGCCACAGCGG	gcg	20	CTCCAACCACTCCACCTTCG	N/A	N/A	N/A
cx43.4 E2	2A-TagRFP-CAAX-SV40	GAGCCATATCTTGCCCACGAAGG	GGGAGGCGTTCGGGCCACAGCGG	CCC	24	AAATCTCCAACCACTCCACCTTCG	N/A	N/A	N/A
cx43.4 E2	2A-TagRFP-CAAX-SV40	GAGCCATATCTTGCCCACGAAGG	GGGAGGCGTTCGGGCCACAGCGG	aaa	36	GGTTGTTGGATGAAATCTCCAACCACTCCACCTTCG	N/A	N/A	N/A
cx43.4 E2	2A-TagRFP-CAAX-SV40	GAGCCATATCTTGCCCACGAAGG	GGGAGGCGTTCGGGCCACAGCGG	gcc	40	ACGCGGTTGTTGGATGAAATCTCCAACCACTCCACCTTCG	N/A	N/A	N/A
cx43.4 E2	2A-TagRFP-CAAX-SV40	GAGCCATATCTTGCCCACGAAGG	GGGAGGCGTTCGGGCCACAGCGG	CCC	48	GTTTTCTTACGCGGTTGTTGGATGAAATCTCCAACCACTCCACCTTCG	N/A	N/A	N/A
cx43.4 E2	2A-TagRFP-CAAX-SV40	GAGCCATATCTTGCCCACGAAGG	GGGAGGCGTTCGGGCCACAGCGG	ttt	60	CCATGAGCTGGAGTTTTCTTACGCGGTTGTTGGATGAAATCTCCAACCACTCCACCTTCG	N/A	N/A	N/A
cx43.4 E2	2A-TagRFP-CAAX-SV40	GAGCCATATCTTGCCCACGAAGG	GGGAGGCGTTCGGGCCACAGCGG	ccc	72	CTTCTTGAAGCACCATGAGCTGGAGTTTTCTTACGCGGTTGTTGGATGAAATCTCCAACCACTCCACCTTCG	N/A	N/A	N/A
cx43.4 E2	2A-TagRFP-CAAX-SV40	GAGCCATATCTTGCCCACGAAGG	GGGAGGCGTTCGGGCCACAGCGG	ggg	96	TCATCGAGGACTGAGACGGTGGTACTTCTTGAAGCACCATGAGCTGGAGTTTTCTTACGCGGTTGTTGGATGAAATCTCCAACCACTCCACCTTCG	N/A	N/A	N/A
cx43.4 E2	2A-TagRFP-CAAX-SV40	GAGCCATATCTTGCCCACGAAGG	GGGAGGCGTTCGGGCCACAGCGG	N/A	1027	GCCTTTAGTAAAAGGATGACAGAAATGAGGCGTGAGGGACAAGTCTATATAGATAGAGAACAACATTGTTCTTTTTTTTTTTTTTTTTTTTTTTGTTACAAACTACAGCGAAAAAGCAGCCCATACCACATATGATATAAATAAAGCAGTAGTGTAAATTATAATATAGAGTTAAATGTTTATTAAAAATCAGTTGATCACATAAAAATGAGTCAATAAGAATGTATTTGTACAAACTTATTCACACATTTGCATTAGTGAGAGCAGGAGAGAAACACTGCACTGGTAAGCAGTATCTCCATAATATTGTTTATGTAAAATAAATGATCATCAAGTTAATCTGTCTTGATGGTCTTTACAAGAGAAGGCATTACCTGCACACAATATAAATTCACAATT…	N/A	1032	TGGGCAAGATATGGCTCACGTTATTCATCATCTTCCGCATTGTTTTGACTGTTGTGGGGGGAGAATCGATATACTACGATGAACAGAGCAAATTTGTGTGTAATACCCAGCAACCTGGTTGTGAGAACGTTTGCTACGATGCATTTGCACCGCTCTCTCATGTCCGGTTCTGGGTTTTCCAGATCATTTTGATCACAACCCCCACTATCATGTACTTGGGATTTGCTATGCACAAGATCGCTCGGTCAAATGATGTGGAGTACAGGCCAGTCAACAGGAAACGCATGCCAATGATCAACCGCGGAGCCAACCGGGATTATGAGGAGGCCGAAGACAACGGTGAGGAAGATCCTATGATTATGGAAGAGATCGTGCCTGAGAAAGAAAAGGCTCCAGAGA…
esama E2	pGTag-2A-Gal4VP16-bactin	GGATGTGATCCAAGGGAAGATGG	GGGAGGCGTTCGGGCCACAGCGG	ctc	24	AAAATGTGGATGTGATCCAAGGGA	gag	24	AGATGGTGGTGCTGCAGGCGTCAT
msna E2	pGTag-2A-Gal4VP16-bactin	GTTTCCCTGTGGTGCTGGGTTGG	GGGAGGCGTTCGGGCCACAGCGG	ttt	48	TGTTCGTGTGACTACAATGGATGCCGAGCTGGAGTTTGCCATCCAACC	GCG	48	cagcaccacagggaaacagttatttgaccaggtttgtgtgtggcctct
msna E6	pGTag-2A-Gal4VP16-bactin	GTCTGGCACGAGGAGCACAAGGG	GGGAGGCGTTCGGGCCACAGCGG	aaa	48	GAATAAGGAGCAATGGGAGGAAAGAATTCAGGTCTGGCACGAGGAGCA	aaa	48	CAAGGGCATGTTGAGGTACAGACAATGGAATGTGCTCTTGCTATTTTT
anxa2a E3	pGTag-2A-Gal4VP16-bactin	TCTGGATCAAAGTTGGCCTCTGG	GGGAGGCGTTCGGGCCACAGCGG	GGG	48	CTCGAACTGGGCGGAGGAGAGCCCACCTACCCTACTGTTGTTCCAGAG	GGG	48	GCCAACTTTGATCCAGACAAAGATGCTGCCAGGATTGAGACCGCTATC
flna E4	pGTag-2A-Gal4VP16-bactin	GGATTGAGTTTGGGCCTCAGAGG	GGGAGGCGTTCGGGCCACAGCGG	GGG	48	TACCTGTCCCAGTTTCCCAAAGCCAAACTCAAGCCTGGTGCCCCTCTG	CCC	42	AGGCCCAAACTCAATCCCAAAAAGGCCCGTGCTTATGGACCA
aqp1a1 E1	pGTag-2A-Gal4VP16-bactin	GGCTTTCTGGCGGGCCGTCCTGG	GGGAGGCGTTCGGGCCACAGCGG	GGG	48	GTCAGTCAGTCATGAACGAGCTGAAGAGCAAGGCTTTCTGGCGGGCCG	TTT	48	TCCTGGCCGAGCTGCTGGGAATGACCCTGTTCATCTTCCTCAGCATTA
aqp8a1 E1	pGTag-2A-Gal4VP16-bactin	CGTGTCCGTCATGGGCAACGTGG	GGGAGGCGTTCGGGCCACAGCGG	AAA	48	TCGGCTCTTTCCTCTTCATGTTTGTGGGCTGCGTGTCCGTCATGGGCA	TTT	48	ACGTGGGCATCAGCGGGAGCATCCAGCCCGCCCTGGCACACGGACTAG
rb1 E2-E4	pGTag-2A-Gal4VP16-bactin	E2 GGAGAGGGAGATCAGATCGATGG, E4 GTCACAGCAGAGTTCACTTTAGG	GGGAGGCGTTCGGGCCACAGCGG	N/A	48	GCTCCAGTCCACTAACTCCATCTGTGATCATGCATGGAGAATATGGGA	N/A	48	ACCCGCCTAGAGAACAAATACGATGTGACTTTGGCCCTCTACCAAAGA
rb1 E2-E25	pGTag-2A-Gal4VP16-bactin	E2 GGAGAGGGAGATCAGATCGATGG, E25 GTCAAAGCGCAGCCTCTTCAGGG	GGGAGGCGTTCGGGCCACAGCGG	N/A	48	GCTCCAGTCCACTAACTCCATCTGTGATCATGCATGGAGAATATGGGA	N/A	48	ATGGACGGACAAGATGAAGCAGACGGAAGgtgggagtcatgatcagtt
msna E2-E6	pGTag-2A-Gal4VP16-bactin	E2 GTTTCCCTGTGGTGCTGGGTTGG, E6 GTCTGGCACGAGGAGCACAAGGG	GGGAGGCGTTCGGGCCACAGCGG	ttt	48	TGTTCGTGTGACTACAATGGATGCCGAGCTGGAGTTTGCCATCCAACC	aaa	48	CAAGGGCATGTTGAGGTACAGACAATGGAATGTGCTCTTGCTATTTTT
kdrl E3-E30	pGTag-2A-Gal4VP16-bactin	E3 GGCTAGCAGAAATGTGTCATCGG, E30 GGAGGACTCGTCCCTTGACTCGG	GGGAGGCGTTCGGGCCACAGCGG	CCC	42	GATCAACTGCACTGCACTGGAGGCTGGCTAGCAGAAATGTGT	N/A	48	actcggagatggagtgtcacagtcctcctccagactataactatgtgg
s1pr1 E2-E2	pGTag-2A-Gal4VP16-bactin	E2 GGAGAACCAGAACATTTTCCAGG, E2 GGGAAACCATAGTGTCTTCTTGG	GGGAGGCGTTCGGGCCACAGCGG	TTT	48	AGCGGACTCTGTTGTGTTCATCATCGTGTGCTGCTTCATCATCCTGGA	GGG	48	TTCTGGGAATATCACCTCTTCTTCTTAAAGGGACTATTCGTGAACTTT
vegfaa E3-E7	pGTag-2A-Gal4VP16-bactin	E3 GTGCAAGACCCGAGAGCTGCTGG, E7 CGTTCGCTCGATCATCATCTTGG	GGGAGGCGTTCGGGCCACAGCGG	CCC	48	TTCCCTTCATGGATGTGTATAAAAAGAGTGCGTGCAAGACCCGAGAGC	CCC	48	TGATGATCGAGCGAACGCCGGGCAGAACTCTGCATGAAGGAAGGAACT
mmp14a E1-E10	pGTag-2A-Gal4VP16-bactin	E1 GCACCAGAAACACACTTGCGAGG, E10 GGGAGCCGGCACAGATGAGGAGG	GGGAGGCGTTCGGGCCACAGCGG	CCC	48	GTTACCGAAACTGCAGACGTTACCTCGGCTTCTGCCTCTCGCCCTCGC	CCC	48	AGGAGGTGCTCATTATTGAAGTGGACGGCTCGGAGGGCGGAGCCATGG
ROSA26	HMEJ donor	TTAACCTGATTCTTGGGCGTTGTCCTGCAGGGGATTGAGCAGGTGTACGA	GGGAGGCGTTCGGGCCACAGCGG	TGAT	48	TGGGCGGGATTCTTTTGCCCTGGCTTAACCTGATTCTTGGGCGTTGTC	GCT	48	TGCAGGGGATTGAGCAGGTGTACGAGGACGAGCCCAATTTCTCTATAT
ROSA26	HR donor	TTAACCTGATTCTTGGGCGTTGTCCTGCAGGGGATTGAGCAGGTGTACGA	N/A	N/A	760	GGAGAGAGCTGCACAAGAGGGCGCTGTCGGCCTCCTGCGGGGGGAGGGGAGGGTCAGTGAAAGTGGCTCCCGCGCGGGCGTCCTGCCACCCTCCCCTCCGGGGGAGTCGGTTTACCCGCCGCCTGCTCGGCTTTGGTATCTGATTGGCTGCTGAAGTCCTGGGAACGGCCCCTTGTTATTGGCTTGGGTCCCAAATGAGCGAAACCACTACGCGAGTCGGCAGGGAGGCGGTCTTTGGTACGGCCCTCCCCGAGGCCAGCGCCGCAGTGTCTGGCCCCTCGCCCCTGCGCAACGTGGCAGGAAGCGCGCGCAGGAGGCGGGGGCGGGCTGCCGGGCCGAGGCTTCTGGGTGGTGGTGACTGCGGCTCCGCCCTGGGCGTCCGCCGCCCGAAGGACGAGA…	N/A	736	TGCAGGGGATTGAGCAGGTGTACGAGGACGAGCCCAATTTCTCTATATTCCCACAGTCTTGAGTTTGTGTCACAAAATAATTATAGTGGGGTGGAGATGGGAAATGAGTCCAGGCAACACCTAAGCCTGATTTTATGCATTGAGACTGCGTGTTATTACTAAAGATCTTTGTGTCGCAATTTCCTGATGAAGGGAGATAGGTTAAAAAGCACGGATCTACTGAGTTTTACAGTCATCCCATTTGTAGACTTTTGCTACACCACCAAAGTATAGCATCTGAGATTAAATATTAATCTCCAAACCTTAGGCCCCCTCACTTGCATCCTTACGGTCAGATAACTCTCACTCATACTTTAAGCCCATTTTGTTTGTTGTACTTGCTCATCCAGTCCCAGACAT…
AAVS1	HMEJ donor	GTCACCAATCCTGTCCCTAGTGG	GGGAGGCGTTCGGGCCACAGCGG	ccc	48	GTTCTGGGTACTTTTATCTGTCCCCTCCACCCCACAGTGGGGCCACTA	aaa	48	GGGACAGGATTGGTGACAGAAAAGCCCCATCCTTAGGCCTCCTCCTTC
AAVS1	HR donor	GTCACCAATCCTGTCCCTAGTGG	N/A	N/A	804	tgctttctctgacctgcattctctcccctgggcctgtgccgctttctgtctgcagcttgtggcctgggtcacctctacggctggcccagatccttccctgccgcctccttcaggttccgtcttcctccactccctcttccccttgctctctgctgtgttgctgcccaaggatgctctttccggagcacttccttctcggcgctgcaccacgtgatgtcctctgagcggatcctccccgtgtctgggtcctctccgggcatctctcctccctcacccaaccccatgccgtcttcactcgctgggttcccttttccttctccttctggggcctgtgccatctctcgtttcttaggatggccttctccgacggatgtctcccttgcgtcccgcctccccttc…	N/A	1000	gattggtgacagaaaagccccatccttaggcctcctccttcctagtctcctgatattgggtctaacccccacctcctgttaggcagattccttatctggtgacacacccccatttcctggagccatctctctccttgccagaacctctaaggtttgcttacgatggagccagagaggatcctgggagggagagcttggcagggggtgggagggaagggggggatgcgtgacctgcccggttctcagtggccaccctgcgctaccctctcccagaacctgagctgctctgacgcggctgtctggtgcgtttcactgatcctggtgctgcagcttccttacacttcccaagaggagaagcagtttggaaaaacaaaatcagaataagttggtcctgagttc…

## Sheet: Primers
Supplementary Table S7 - Primers and oligos
Primer name	Sequence	Purpose
notojxn5'f	GCTTTTTGGACTAAACAGACGCCATG	Junction fragment analysis
notojxn3'r	cttgtgcgtacacagctccacg	Junction fragment analysis
notojxn3'delr	CGATGTTATACTTGCTTCTTTTTAGTTTTGTACATAT	Junction fragment analysis
tyrjxn5'f	CATCTTTGAGCAGTGGTTGAGGAGA	Junction fragment analysis
tyrjxn3'r	CACCTGGATCCTGTAAATATGCATATTCATATC	Junction fragment analysis
esamajxn5'f	ggtctttcagtcagcgagtttaatgtc	Junction fragment analysis
esamajxn3'r	CATTTCAGTGCTGGTAGCAGACTG	Junction fragment analysis
cx43.4jxn5'f	GCAGGACTGAGACGGTGGTA	Junction fragment analysis
cx43.4fxn3'r	CAAATGCATCGTAGCAAACG	Junction fragment analysis
Rb2jF	AAGGACAAGGATCCTGAGTTTG	Junction fragment analysis
galjf	GCAAACGGCCTTAACTTTCC	Junction fragment analysis
GaljR	GCCTTGATTCCACTTCTGTCA	Junction fragment analysis
Rb4jR	GCTTTGCATCACAACCTCAA	Junction fragment analysis
Rb25jR	AGCCAGCTTCTGGATCAGTG	Junction fragment analysis
RFP5'jxnr	CCTTAATCAGTTCCTCGCCCTTAGA	Junction fragment analysis
sv403'jxnf	GGGGAGGTGTGGGAGGTTTT	Junction fragment analysis
gfp5'R	GCTGAACTTGTGGCCGTTTA	Junction fragment analysis
GFP3'F	ACATGGTCCTGCTGGAGTTC	Junction fragment analysis
F-msna-exon2	TTCCTTCATTCATTCATTGACA	Junction fragment analysis
R-msna-exon2	GGGCACGGCTACAAAGAAG	Junction fragment analysis
R-msna-exon6	CGTGTGATTGACAGGGTCAC	Junction fragment analysis
F-msna-exon6	GTTCTGGAGCAGCACAAGC	Junction fragment analysis
anxa2a5'Cut3'JxnPrR	CTTCCAGACAGGACGAGTGA	Junction fragment analysis
anxa2a5'Cut5'JxnPrF	TTTCCTCATTGTTTGGCTGT	Junction fragment analysis
F-1a1junc	agattagaggcgtcagtccg	Junction fragment analysis
R-1a1junc	gctgaggaagatgaacaggg	Junction fragment analysis
KDRLEx3JxnF	TTGTTTTTGTTGTGACTTCCAAT	Junction fragment analysis
KDRLEx30JxnR	GGGTGGTGTGGAGTAACGAA	Junction fragment analysis
S1PR1.5'JxnF	ACAAGGACCCGGGACTCA	Junction fragment analysis
S1PR1.3'JxnR	CGAGACGAAAAAGTTCACGA	Junction fragment analysis
vegfaaEx3.5'JxnF	AACACTCTCGCTTTGCTTCC	Junction fragment analysis
vegfaaEx7.3'JxnR	TGCTGTGCCGTTTAAAAAGTT	Junction fragment analysis
R-8a1-exon1_junc	tgatttccccaaaaattgct	Junction fragment analysis
F-8a1-exon1_junc	gcccttcttcgagcactaca	Junction fragment analysis
notoSBf	CAGATGCCACACTTCGCGT	Southern blot analysis
notoSBr	CGATGTTATACTTGCTTCTTTTTAGTTTTGTACATAT	Southern blot analysis
tyrSBe3f	GTTTTGCTAATCCTGAGACGGGTTTG	Southern blot analysis
tyrSBe3r	CTGTCAATAAAAGCATGATGTATGATGAAAATGG	Southern blot analysis
esamaSBe3f	ATCATCTCATTCGTCAATGGAGACTTCAG	Southern blot analysis
esamaSBi4r	CACAGTGTGGCAGTGAGCATTC	Southern blot analysis
gal4SBr	CTGAAGAACAACTGGGAGTGTCGC	Southern blot analysis
gal4SBf	TTACATATCCAGAGCGCCGTAGGG	Southern blot analysis
rfpSBf	ATGGTGTCTAAGGGCGAAGAGC	Southern blot analysis
rfpSBr	AGCTTCAGGGCCATGTCGC	Southern blot analysis
F-2A-Gal4-BamHI	GGATCCGGAGCCACGAACTTCTCTCTGTTAAAGCAAGCAGGAGACGTGGAAGAAAACCCCGGTCCTtctagaAAGCTACTGTCTTCTATCGAACAAGCA	pGTag vector cloning
R-Gal4-NcoI	gcatCCATGGTAATTTATTTAGCAGTAGATAGCTATATTGTGTGAAACGC	pGTag vector cloning
F-eGFP-speI	agacatactagtatggtgagcaagggcgaggagctg	pGTag vector cloning
R-eGFP-XhoI	tggatcCtcgagttacttgtacagctcgt	pGTag vector cloning
F-p494-XhoI	cgctgcctcgagGGCGCGCCTCTAGAACTATAG	pGTag vector cloning
R-p494-SpeI	agccatactagtAGGACCGGGGTTTTCTT	pGTag vector cloning
F-lacZ	tgatacacgcaggtgcgcaacgcaattaatgtgagtt	pGTag vector cloning
R-lacZ	atcctgtggcaggtccattcgccattcaggctgc	pGTag vector cloning
F-lacZ-universal-1	GGGAGGCGTTCGGGCCACAGCGGacacgcaggtgcgcaacgcaattaatg	pGTag vector cloning
R-lacZ-universal-BamHI	ctgatcggatcctgtggcaggtccattcg	pGTag vector cloning
F-lacZ-universal-EcoRI	gtacatgaattcGGGAGGCGTTCGGGCCACAG	pGTag vector cloning
F-3’-uni-1	CGTTGTCTAGCAAGGAAGTGAaga	pGTag vector cloning
R-3’-uni-1	GGGAGGCGTTCGGGCCACAGCGGagaagagcatattcaatgtcg	pGTag vector cloning
F-3’-uniNco1	tgcaGccatggCGTTGTCTAGCAAGGAAGTGAaga	pGTag vector cloning
R-3’-uniEagI	tcgaGcggccgAGATCCCATCGCTAGCGGG	pGTag vector cloning
F-TagRFPfix	5'phos\cttaatcagttcctcgcccttag	pGTag vector cloning
R-TagRFPfix	5'phos-gagaacatgcacatgaagctgtac	pGTag vector cloning
F-BBfix	5'phos\AATACGCAAACCGCCTCTCC	pGTag vector cloning
R-BBfix	5'phos\GGGCGCaCaTCCGCTTC	pGTag vector cloning
F-Bactfix	5'phos\TTTAAAAGTCAAACCACCATGACTG	pGTag vector cloning
R-Bactfix	5'phos\CTGGCAGTTCCTTCCTGTTAA	pGTag vector cloning
F-Bact-AscI	ATATGTGGCGCGCCACGGACTGTTACCACTTCACG	pGTag vector cloning
R-Bact-NcoI	ACAACGCCATGGTAATTTATTTAGC	pGTag vector cloning
F-gal4-Ecofix	5'phos\aCAGATCTCTCGAGCCGCCCC	pGTag vector cloning
R-gal4-Ecofix	5'phos\ATTCCCGGGGTCGACCTCGA	pGTag vector cloning
noto E1 guide	taatacgactcactataGGGAGCGCAGAGCTGGAGACgttttagagctagaa	gRNA oligo A
noto E2 guide	taatacgactcactataGACTGGAGAAAGAGTTCGCGgttttagagctagaa	gRNA oligo A
tyr E4 guide	taatacgactcactatagGTTCCTGTAGAGAGGGATGAgttttagagctagaa	gRNA oligo A
cx43.4 E2 guide	taatacgactcactataGGGCCATATCTTGCCCACGAgttttagagctagaa	gRNA oligo A
esama E2 guide	taatacgactcactataGGATGTGATCCAAGGGAAGAgttttagagctagaa	gRNA oligo A
msna E2 guide	taatacgactcactataGGTTCCCTGTGGTGCTGGGTgttttagagctagaa	gRNA oligo A
msna E6 guide	taatacgactcactataGGCTGGCACGAGGAGCACAAgttttagagctagaa	gRNA oligo A
anxa2a E3 guide	taatacgactcactataGGTGGATCAAAGTTGGCCTCgttttagagctagaa	gRNA oligo A
flna E4 guide	taatacgactcactataGGATTGAGTTTGGGCCTCAGgttttagagctagaa	gRNA oligo A
aqp1a1 E1	taatacgactcactataGGCTTTCTGGCGGGCCGTCCgttttagagctagaa	gRNA oligo A
aqp8a1 E1	taatacgactcactataGGTGTCCGTCATGGGCAACGgttttagagctagaa	gRNA oligo A
rb1 E2 guide	taatacgactcactataGGAGAGGGAGATCAGATCGAgttttagagctagaa	gRNA oligo A
rb1 E4 guide	taatacgactcactataGGCACAGCAGAGTTCACTTTgttttagagctagaa	gRNA oligo A
rb1 E25 guide	taatacgactcactataGGCAAAGCGCAGCCTCTTCAgttttagagctagaa	gRNA oligo A
kdrl E3 guide	taatacgactcactataGGCTAGCAGAAATGTGTCATgttttagagctagaa	gRNA oligo A
kdrl E30 guide	taatacgactcactataGGAGGACTCGTCCCTTGACTgttttagagctagaa	gRNA oligo A
s1pr1 E2a guide	taatacgactcactataGGAGAACCAGAACATTTTCCgttttagagctagaa	gRNA oligo A
s1pr1 E2b guide	taatacgactcactataGGGAAACCATAGTGTCTTCTgttttagagctagaa	gRNA oligo A
vegfaa E3 guide	taatacgactcactataGGGGCAAGACCCGAGAGCTGCgttttagagctagaa	gRNA oligo A
vegfaa E7 guide	taatacgactcactataGGGTTCGCTCGATCATCATCTgttttagagctagaa	gRNA oligo A
mmp14a E1 guide	taatacgactcactataGGACCAGAAACACACTTGCGgttttagagctagaa	gRNA oligo A
mmp14a E10 guide	taatacgactcactataGGGAGCCGGCACAGATGAGGgttttagagctagaa	gRNA oligo A
CRISPR Oligo B	AAAAGCACCGACTCGGTGCCACTTTTTCAAGTTGATAACGGACTAGCCTTATTTTAACTTGCTATTTCTAGCTCTAAAAC	Oligo B for gRNA synthesis
noto E1 5' arm bait A 12	aattcGGGAGCGCAGAGCTGGAGACAGGCAAACGTCTGTCg	Homology arm oligo
noto E1 5' arm bait B 12	gatccGACAGACGTTTGCCTGTCTCCAGCTCTGCGCTCCCg	Homology arm oligo
noto E1 5' arm bait A 24	aattcGGGAGCGCAGAGCTGGAGACAGGAGCATAACCAACCAAACGCCTGTCg	Homology arm oligo
noto E1 5' arm bait B 24	gatccGACAGGCGTTTGGTTGGTTATGCTCCTGTCTCCAGCTCTGCGCTCCCg	Homology arm oligo
noto E1 5' arm bait A 48	aattcGGGAGCGCAGAGCTGGAGACAGGAGAGAACGAACAAACGCGTACCGGAGCATAACCAACCAAACGCCTGTg	Homology arm oligo
noto E1 5' arm bait B 48	gatccACAGGCGTTTGGTTGGTTATGCTCCGGTACGCGTTTGTTCGTTCTCTCCTGTCTCCAGCTCTGCGCTCCCg	Homology arm oligo
noto E1 5' arm A 24	aattcGGGAGCGCAGAGCTGGAGACAGGaaaAGCATAACCAACCAAACGCCTGTCg	Homology arm oligo
noto E1 5' arm B 24	gatccGACAGGCGTTTGGTTGGTTATGCTtttCCTGTCTCCAGCTCTGCGCTCCCg	Homology arm oligo
noto E1 3' arm A 24	catggTCCAGCTCTGCGCTCCCGCTTATTCCGCTGTGGCCCGAACGCCTCCCc	Homology arm oligo
noto E1 3' arm B 24	ggccgGGGAGGCGTTCGGGCCACAGCGGAATAAGCGGGAGCGCAGAGCTGGAc	Homology arm oligo
noto E1 5' arm A 48	GCGGaaaAGAGAACGAACAAACGCGTACCGGAGCATAACCAACCAAACGCCTGTC	Homology arm oligo
noto E1 5' arm B 48	atccGACAGGCGTTTGGTTGGTTATGCTCCGGTACGCGTTTGTTCGTTCTCTttt	Homology arm oligo
noto E1 3' arm A 48	aagTCCAGCTCTGCGCTCCCGCTTATTTACTCGCAGATGCCACACTTCGCGggg	Homology arm oligo
noto E1 3' arm B 48	cggcccCGCGAAGTGTGGCATCTGCGAGTAAATAAGCGGGAGCGCAGAGCTGGA	Homology arm oligo
noto E2 5' arm bait A 24	aattcGACTGGAGAAAGAGTTCGCGCGGGCTGTCCAGACTGGAGAAAGAGTTCg	Homology arm oligo
noto E2 5' arm bait B 24	gatccGAACTCTTTCTCCAGTCTGGACAGCCCGCGCGAACTCTTTCTCCAGTCg	Homology arm oligo
noto E2 5' arm UgRNA bait A 24	aattcGGGAGGCGTTCGGGCCACAGCGGGCTGTCCAGACTGGAGAAAGAGTTCg
noto E2 5' arm UgRNA bait B 24	gatccGAACTCTTTCTCCAGTCTGGACAGCCCGCTGTGGCCCGAACGCCTCCCg
tyr E4 5' arm A 48	aattcGGGAGGCGTTCGGGCCACAGCGGaaaCCAACGCCCCCATCGGACACAACGACGGATACTTCATGGTGCCCTTCAttg	Homology arm oligo
tyr E4 5' arm B 48	gatccaaTGAAGGGCACCATGAAGTATCCGTCGTTGTGTCCGATGGGGGCGTTGGtttCCGCTGTGGCCCGAACGCCTCCCg	Homology arm oligo
tyr E4 3' arm A 48	catggTCCCTCTCTACAGGAACGGAGACTATTTTCTCTCCACGAAAGCCCTGGaaaCCGCTGTGGCCCGAACGCCTCCCc	Homology arm oligo
tyr E4 3' arm B 48	ggccgGGGAGGCGTTCGGGCCACAGCGGtttCCAGGGCTTTCGTGGAGAGAAAATAGTCTCCGTTCCTGTAGAGAGGGAc	Homology arm oligo
cx43.4 E2 5' arm A 24	GCGGcccAAATCTCCAACCACTCCACCTTCGtg	Homology arm oligo
cx43.4 E2 5' arm B 24	ATCCcaCGAAGGTGGAGTGGTTGGAGATTTggg	Homology arm oligo
cx43.4 E2 3' arm A 24	AAGTGGGCAAGATATGGCTCACGTTATggg	Homology arm oligo
cx43.4 E2 3' arm B 24	CGGcccATAACGTGAGCCATATCTTGCCCA	Homology arm oligo
cx43.4 E2 5' arm A 48	GCGGcccGTTTTCTTACGCGGTTGTTGGATGAAATCTCCAACCACTCCACCTTCGtg	Homology arm oligo
cx43.4 E2 5' arm B 48	ATCCcaCGAAGGTGGAGTGGTTGGAGATTTCATCCAACAACCGCGTAAGAAAACggg	Homology arm oligo
cx43.4 E2 3' arm A 48	AAGTGGGCAAGATATGGCTCACGTTATTCATCATCTTCCGCATTGTTTTGAaaa	Homology arm oligo
cx43.4 E2 3' arm B 48	CGGtttTCAAAACAATGCGGAAGATGATGAATAACGTGAGCCATATCTTGCCCA	Homology arm oligo
esama E2 5' arm A 24	AATTCGGGAGGCGTTCGGGCCACAGCGGCTCAAAATGTGGATGTGATCCAAGGGATTG	Homology arm oligo
esama E2 5' arm B 24	GATCCAATCCCTTGGATCACATCCACATTTTGAGCCGCTGTGGCCCGAACGCCTCCCG	Homology arm oligo
esama E2 3' arm A 24	CATGGAGATGGTGGTGCTGCAGGCTTCATAGACCGCTGTGGCCCGAACGCCTCCCC	Homology arm oligo
esama E2 3' arm B 24	GGCCGGGGAGGCGTTCGGGCCACAGCGGTCTATGAAGCCTGCAGCACCACCATCTC	Homology arm oligo
msna E2 5' arm A 48	GCGGTTTtgttcgtgtgactacaatggatgccgagctggagtttgccatccaaccC	Homology arm oligo
msna E2 5' arm B 48	ATCCGggttggatggcaaactccagctcggcatccattgtagtcacacgaacaAAA	Homology arm oligo
msna E2 3' arm A 48	AAGcagcaccacagggaaacagttatttgaccaggtttgtgtgtggcctctGCG	Homology arm oligo
msna E2 3' arm B 48	cggCGCagaggccacacacaaacctggtcaaataactgtttccctgtggtgctg	Homology arm oligo
msna E6 5' arm A 48	GCGGaaaGAATAAGGAGCAATGGGAGGAAAGAATTCAGGTCTGGCACGAGGAGCAc	Homology arm oligo
msna E6 5' arm B 48	ATCCgTGCTCCTCGTGCCAGACCTGAATTCTTTCCTCCCATTGCTCCTTATTCttt	Homology arm oligo
msna E6 3' arm A 48	aagCAAGGGCATGTTGAGGTACAGACAATGGAATGTGCTCTTGCTATTTTTaaa	Homology arm oligo
msna E6 3' arm B 48	cggtttAAAAATAGCAAGAGCACATTCCATTGTCTGTACCTCAACATGCCCTTG	Homology arm oligo
anxa2a E3 5' arm A	GCGGGGGCTCGAACTGGGCGGAGGAGAGCCCACCTACCCTACTGTTGTTCCAGAG	Homology arm oligo
anxa2a E3 5' arm B	ATCCCTCTGGAACAACAGTAGGGTAGGTGGGCTCTCCTCCGCCCAGTTCGAGCCC	Homology arm oligo
anxa2a E3 3' arm A	AAGGCCAACTTTGATCCAGACAAAGATGCTGCCAGGATTGAGACCGCTATCGGG	Homology arm oligo
anxa2a E3 3' arm B	CGGCCCGATAGCGGTCTCAATCCTGGCAGCATCTTTGTCTGGATCAAAGTTGGC	Homology arm oligo
flna E4 5' arm A	GCGGGGGTACCTGTCCCAGTTTCCCAAAGCCAAACTCAAGCCTGGTGCCCCTCTG	Homology arm oligo
flna E4 5' arm B	ATCCCAGAGGGGCACCAGGCTTGAGTTTGGCTTTGGGAAACTGGGACAGGTACCC	Homology arm oligo
flna E4 3' arm A	AAGAGGCCCAAACTCAATCCCAAAAAGGCCCGTGCTTATGGACCACCC	Homology arm oligo
flna E4 3' arm B	CGGGGGTGGTCCATAAGCACGGGCCTTTTTGGGATTGAGTTTGGGCCT	Homology arm oligo
aqp1a1 E1 5' arm A	GCGGGGGGTCAGTCAGTCATGAACGAGCTGAAGAGCAAGGCTTTCTGGCGGGCCGCC	Homology arm oligo
aqp1a1 E1 5' arm B	ATCCGGCGGCCCGCCAGAAAGCCTTGCTCTTCAGCTCGTTCATGACTGACTGACCCC	Homology arm oligo
aqp1a1 E1 3' arm A	AAGTCCTGGCCGAGCTGCTGGGAATGACCCTGTTCATCTTCCTCAGCATTATTT	Homology arm oligo
aqp1a1 E1 3' arm B	CGGAAATAATGCTGAGGAAGATGAACAGGGTCATTCCCAGCAGCTCGGCCAGGA	Homology arm oligo
aqp8a1 E1 5' arm A	GCGGAAATCGGCTCTTTCCTCTTCATGTTTGTGGGCTGCGTGTCCGTCATGGGCATT	Homology arm oligo
aqp8a1 E1 5' arm B	ATCCAATGCCCATGACGGACACGCAGCCCACAAACATGAAGAGGAAAGAGCCGATTT	Homology arm oligo
aqp8a1 E1 3' arm A	AAGACGTGGGCATCAGCGGGAGCATCCAGCCCGCCCTGGCACACGGACTAGTTT	Homology arm oligo
aqp8a1 E1 3' arm B	CGGAAACTAGTCCGTGTGCCAGGGCGGGCTGGATGCTCCCGCTGATGCCCACGT	Homology arm oligo
rb1 E2 5' arm A	gcggGCTCCAGTCCACTAACTCCATCTGTGATCATGCATGGAGAATATGGGAaAGaGAaATtAGgagcATGGac	Homology arm oligo
rb1 E2 5' arm B	atccgtCCATgctcCTaATtTCtCTtTCCCATATTCTCCATGCATGATCACAGATGGAGTTAGTGGACTGGAGC	Homology arm oligo
rb1 E4 3' arm A	aagCCTAAgGTcAAtagcGCcGTcACCCGCCTAGAGAACAAATACGATGTGACTTTGGCCCTCTACCAAAGA	Homology arm oligo
rb1 E4 3' arm B	cggTCTTTGGTAGAGGGCCAAAGTCACATCGTATTTGTTCTCTAGGCGGGTgACgGCgctaTTgACcTTAGG	Homology arm oligo
rb1 E25 3' arm A	aagCCCTcAAaAGaCTcagaTTcGAtATGGACGGACAAGATGAAGCAGACGGAAGgtgggagtcatgatcagtt	Homology arm oligo
rb1 E25 3' arm B	cggaactgatcatgactcccacCTTCCGTCTGCTTCATCTTGTCCGTCCATaTCgAAtctgAGtCTtTTgAGGG	Homology arm oligo
kdrl E3 5' arm A	GCGGCCCGATCAACTGCACTGCACTGGAGGCTGGCTAGCAGAAATGTGTCC	Homology arm oligo
kdrl E3 5' arm B	ATCCGGACACATTTCTGCTAGCCAGCCTCCAGTGCAGTGCAGTTGATCGGG	Homology arm oligo
kdrl E30 3' arm A	AAGACTCGGAGATGGAGTGTCACAGTCCTCCTCCAGACTATAACTATGTGGCCC	Homology arm oligo
kdrl E30 3' arm B	CGGGGGCCACATAGTTATAGTCTGGAGGAGGACTGTGACACTCCATCTCCGAGT	Homology arm oligo
s1pr1 E2 5' arm A	GCGGtttAGCGGACTCTGTTGTGTTCATCATCGTGTGCTGCTTCATCATCCTGGAa	Homology arm oligo
s1pr1 E2 5' arm B	ATCCtTCCAGGATGATGAAGCAGCACACGATGATGAACACAACAGAGTCCGCTaaa	Homology arm oligo
s1pr1 E2 3' arm A	AAGTTCTGGGAATATCACCTCTTCTTCTTAccc	Homology arm oligo
s1pr1 E2 3' arm B	CGGgggTAAGAAGAAGAGGTGATATTCCCAGAA	Homology arm oligo
vegfaa E3 5' arm A	GCGGCCCTTCCCTTCATGGATGTGTATAAAAAGAGTGCGTGCAAGACCCGAGAGCAA	Homology arm oligo
vegfaa E3 5' arm B	ATCCTTGCTCTCGGGTCTTGCACGCACTCTTTTTATACACATCCATGAAGGGAAGGG	Homology arm oligo
vegfaa E7 3' arm A	AAGTGATGATCGAGCGAACGCCGGGCAGAACTCTGCATGAAGGAAGGAACTCCC	Homology arm oligo
vegfaa E7 3' arm B	CGGGGGAGTTCCTTCCTTCATGCAGAGTTCTGCCCGGCGTTCGCTCGATCATCA	Homology arm oligo
mmp14a E1 5' arm A	GCGGCCCGTTACCGAAACTGCAGACGTTACCTCGGCTTCTGCCTCTCGCCCTCGCC	Homology arm oligo
mmp14a E1 5' arm B	ATCCGGCGAGGGCGAGAGGCAGAAGCCGAGGTAACGTCTGCAGTTTCGGTAACGGG	Homology arm oligo
mmp14a E10 3' arm A	AAGAGGAGGTGCTCATTATTGAAGTGGACGGCTCGGAGGGCGGAGCCATGGCCC	Homology arm oligo
mmp14a E10 3' arm B	CGGGGGCCATGGCTCCGCCCTCCGAGCCGTCCACTTCAATAATGAGCACCTCCT	Homology arm oligo
anxa2a5'Cut3'JxnPrR	CTTCCAGACAGGACGAGTGA	Junction fragment analysis
anxa2a5'Cut5'JxnPrF	TTTCCTCATTGTTTGGCTGT	Junction fragment analysis
flnaEx4 PrF	GTGGACGAGCACTCCGTTAT	Junction fragment analysis
flnaEx4.3'JxnR	AACCGCAAACAAAGCTGTTC	Junction fragment analysis
cx43.4 E2 5' arm A 40	GCGGgccACGCGGTTGTTGGATGAAATCTCCAACCACTCCACCTTCGtg	Homology arm oligo
cx43.4 E2 5' arm B 40	ATCCcaCGAAGGTGGAGTGGTTGGAGATTTCATCCAACAACCGCGTggc	Homology arm oligo
cx43.4 E2 3' arm A 40	AAGTGGGCAAGATATGGCTCACGTTATTCATCATCTTCCGCATaaa	Homology arm oligo
cx43.4 E2 3' arm B 40	CGGtttATGCGGAAGATGATGAATAACGTGAGCCATATCTTGCCCA	Homology arm oligo
cx43.4 E2 5' arm A 20	GCGGcgcCTCCAACCACTCCACCTTCGtg	Homology arm oligo
cx43.4 E2 5' arm B 20	ATCCcaCGAAGGTGGAGTGGTTGGAGgcg	Homology arm oligo
cx43.4 E2 3' arm A 20	AAGTGGGCAAGATATGGCTCACGggg	Homology arm oligo
cx43.4 E2 3' arm B 20	CGGcccCGTGAGCCATATCTTGCCCA	Homology arm oligo
F-cx43.4_1kbp-5'A-1032	acctgccacaGCGGGCCTTTAGTAAAAGGATGACAGAAATGA	1kb Homology arm cloning
R-cx43.4_1kbp-5'b	acctgccacaATCCCACGAAGGTGGAGTGGTTG	1kb Homology arm cloning
F-cx43.4_1kbp-3'Absqq1	tgactgctcttctaagTGGGCAAGATATGGCTCAC	1kb Homology arm cloning
R-cx43.4_1032-3'b-bspq1	tcagtgctcttcaCGGTAAGTCTGTTCTGCTCGACAGC	1kb Homology arm cloning
